# Supplementary material for: Efficacy, Safety, and Immunogenicity of HLX02 Compared with Reference Trastuzumab in Patients with Recurrent or Metastatic HER2-Positive Breast Cancer: A Randomized Phase III Equivalence Trial
Source: Springer Nature journal article supplement (doi:10.1007/s40259-021-00475-w), 2021-04-07
Supplement: MOESM1 [file 24111530]

**Efficacy, safety and immunogenicity of HLX02 compared with reference  
trastuzumab in patients with recurrent or metastatic HER2-positive breast  
cancer: a randomized phase 3 equivalence trial**

**Running head:** Global phase 3 equivalence study comparing HLX02 and reference trastuzumab

**Authors:**

Binghe Xu<sup>1\*</sup>, Qingyuan Zhang<sup>2\*</sup>, Tao Sun<sup>3</sup>, Wei Li<sup>4</sup>, Yue'e Teng<sup>5</sup>, Xichun Hu<sup>6</sup>, Igor Bondarenko<sup>7</sup>,  
Hryhoriy Adamchuk<sup>8</sup>, Liangming Zhang<sup>9</sup>, Dmytro Trukhin<sup>10</sup>, Shusen Wang<sup>11</sup>, Hong Zheng<sup>12</sup>,  
Zhongsheng Tong<sup>13</sup>, Yaroslav Shparyk<sup>14</sup>, Qingyu Wang<sup>15</sup> and HLX02-BC01 Investigators<sup>#</sup>

\* Binghe Xu and Qingyuan Zhang contributed equally to this work.

# Investigators of HLX02-BC01 are listed in supplementary table 1.

**Affiliations:**

<sup>1</sup>Department of Medical Oncology, National Cancer Center/Cancer Hospital, Chinese Academy of  
Medical Sciences and Peking Union Medical College, Beijing, China

<sup>2</sup>Medical Oncology, Harbin Medical University Cancer Hospital, Harbin, China

<sup>3</sup>Internal Medicine Oncology, Liaoning Cancer Hospital, Liaoning, China

<sup>4</sup>Internal Medicine Oncology, the First Hospital of Jilin University, Jilin, China

<sup>5</sup>Internal Medicine Oncology, the First Hospital of China Medical University, Shenyang, China

<sup>6</sup>Internal Medicine Oncology, Shanghai Cancer Hospital, Fudan University, Shanghai, China

<sup>7</sup>Chemotherapy Department, Communal Institution Dnipropetrovsk City Multifield Clinical Hospital,  
Dnipro, Ukraine

<sup>8</sup>Chemotherapy Department, Communal Institution Kryvyi Rih Oncology Dispensary of  
Dnipropetrovsk Regional Council, Kryvyi Rih, Ukraine

<sup>9</sup>Internal Medicine Oncology, Yantai Yuhuangding Hospital, Yantai, Shandong, China

<sup>10</sup>Daystay Care of Dispensary and Polyclinic Department, Communal Institution Odesa Regional  
Oncological Dispensary, Odesa, Ukraine

<sup>11</sup>Internal Medicine Oncology, Sun Yat-Sen University, Cancer Center, Guangzhou, China

<sup>12</sup>Internal Medicine Oncology, West China Hospital, Sichuan University, Sichuan, China

<sup>13</sup>Internal Medicine Oncology, Tianjin Cancer Hospital, Tianjin, China

<sup>14</sup>CI of LRC Lviv Oncological Regional Treatment and Diagnostic Center, Lviv, Ukraine

<sup>15</sup>Shanghai Henlius Biotech, Inc., Shanghai, China

**Corresponding author:**

Binghe Xu,

Cancer Hospital Chinese Academy of Medical Sciences

No.17, Panjiayuan Nanli, Beijing, 100021, China

Email: xubinghe@medmail.com.cn

Telephone: +86-01087788826

## Supplementary materials

Supplementary fig. 1: Study design

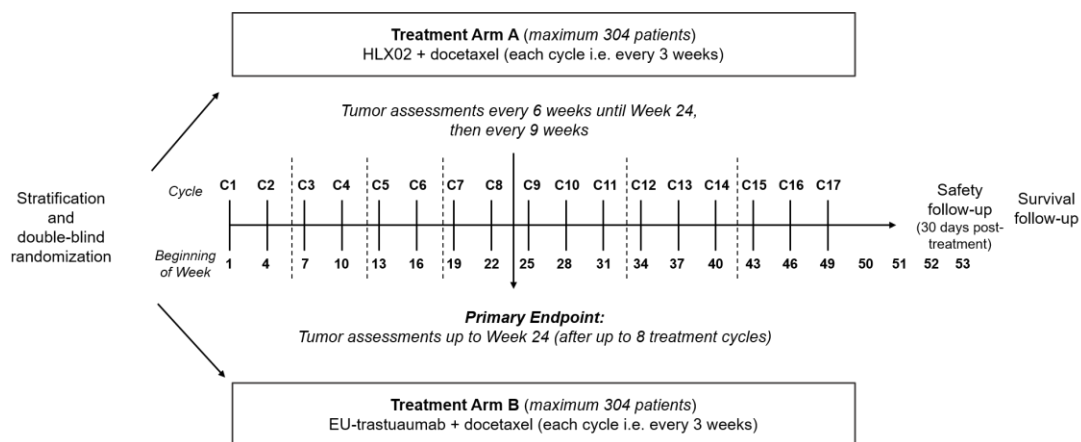

C, cycle; EU-trastuzumab, European Union sourced trastuzumab.

**Supplementary fig. 2:** Mean (SD) drug serum concentration-time profiles for HLX02 and EU-trastuzumab treatment group—PK set

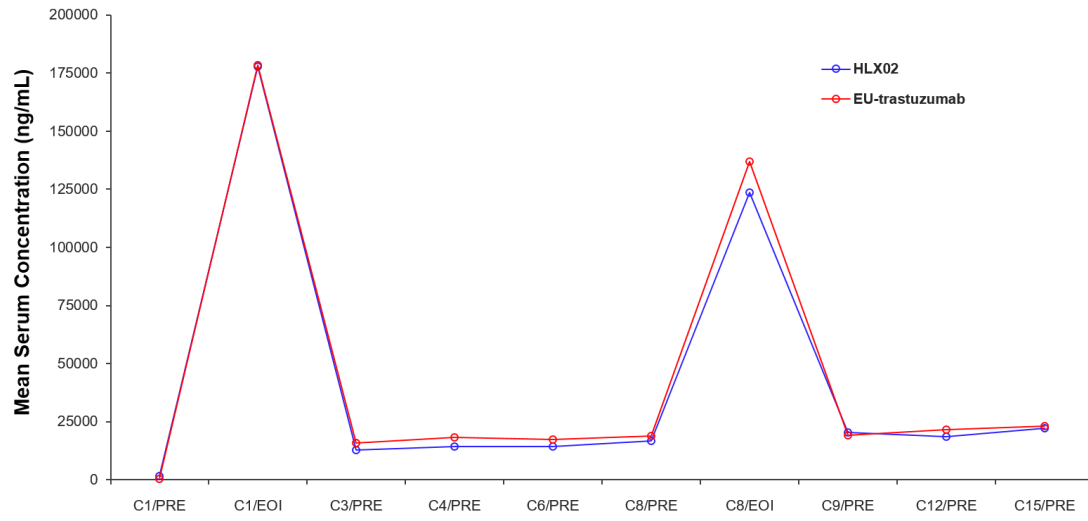

C, cycle; EOI, end of infusion; PK, pharmacokinetic; PRE, pre-dose.

**Supplementary table 1:** List of investigators and study sites

| <b>Principal Investigator</b> | <b>Study Site</b>                                                                                   | <b>Country</b> | <b>Number of Patients Randomized</b> |
|-------------------------------|-----------------------------------------------------------------------------------------------------|----------------|--------------------------------------|
| Qingyuan Zhang                | Harbin Medical University Cancer Hospital                                                           | China          | 45                                   |
| Tao Sun                       | Liaoning Cancer Hospital & Institute                                                                | China          | 39                                   |
| Wei Li                        | The First Hospital of Jilin University                                                              | China          | 36                                   |
| Yuee Teng                     | The First Hospital of China Medical University                                                      | China          | 28                                   |
| Xichun Hu                     | Fudan University Shanghai Cancer Center                                                             | China          | 22                                   |
| Igor Bondarenko               | CI Dnipropetrovsk CMCH #4 of Dnipropetrovsk RC<br>Dept of Chemotherapy SI Dnipropetrovsk MA of MOHU | Ukraine        | 22                                   |
| Binghe Xu                     | Cancer Institute and Hospital, Chinese Academy of Medical Sciences                                  | China          | 20                                   |
| Hryhoriy Adamchuk             | CI Kryvyi Rih Oncological Dispensary of DRC                                                         | Ukraine        | 16                                   |
| Liangming Zhang               | Yantai Yuhuangding Hospital                                                                         | China          | 15                                   |
| Dmytro Trukhin                | Odesa Regional Oncologic Dispensary                                                                 | Ukraine        | 14                                   |
| Shusen Wang                   | Sun Yat-sen University, Cancer Center                                                               | China          | 13                                   |
| Hong Zheng                    | West China Hospital, Sichuan University                                                             | China          | 13                                   |
| Zhongsheng Tong               | Tianjin Medical University Cancer Institute & Hospital                                              | China          | 13                                   |
| Yaroslav Shparyk              | CI of LRC Lviv Oncological Regional Treatment and Diagnostic Center                                 | Ukraine        | 13                                   |
| Xinhong Wu                    | Hubei Cancer Hospital                                                                               | China          | 12                                   |
| Herui Yao                     | Sun Yat-sen Memorial hospital, Sun Yat-sen University                                               | China          | 12                                   |
| Yuping Sun                    | Jinan Central Hospital                                                                              | China          | 12                                   |
| Huiping Li                    | Beijing Cancer Hospital                                                                             | China          | 11                                   |
| Yunjiang Liu                  | The Fourth Hospital of Hebei Medical University                                                     | China          | 11                                   |
| Shuqun Zhang                  | The 2nd Hospital of Xi'an Jiaotong University                                                       | China          | 11                                   |
| Xiaohua Zeng                  | Chongqing Cancer Hospital                                                                           | China          | 11                                   |
| Ihor Vynnychenko              | RCI Sumy Regional Clinical Oncological Dispensary<br>Dept of of Chemotherapy Sumy SU                | Ukraine        | 11                                   |
| Xiaojia Wang                  | Zhejiang Cancer Hospital                                                                            | China          | 10                                   |
| Li Sun                        | Xuzhou Central Hospital                                                                             | China          | 9                                    |
| Yongmei Yin                   | Jiangsu Province Hospital                                                                           | China          | 9                                    |
| Kunwei Shen                   | Ruijin Hospital, Shanghai Jiaotong Uni. School of Med.                                              | China          | 9                                    |
| Olexiy Kovalyov               | CI Zaporizhzhia RC Onc Dispensary of ZRC Dept of Breast Pathology SI Zaporizhzhia MA of PGE of MoHU | Ukraine        | 9                                    |
| Jian Huang                    | The Second Affiliated Hospital Zhejiang University School of Medicine                               | China          | 8                                    |
| Chunhong Hu                   | The 2nd Xiangya Hospital Central South University                                                   | China          | 8                                    |
| Anatoliy Hontsa               | CI Chernivtsi RC Oncological Dispensary                                                             | Ukraine        | 8                                    |
| Dmytro Osynskyi               | Kyiv City Clinical Oncological Center                                                               | Ukraine        | 8                                    |
| Buhai Wang                    | Northern Jiangsu People's Hospital                                                                  | China          | 7                                    |
| Jin Yang                      | First Affiliated Hospital of Xi'an Jiaotong University                                              | China          | 7                                    |

|                      |                                                                                                             |             |   |
|----------------------|-------------------------------------------------------------------------------------------------------------|-------------|---|
| Zhendong Chen        | The second hospital of Anhui medical university                                                             | China       | 7 |
| Vadym Prianikov      | Communal Non-profit Enterprise Regional Center of Oncology                                                  | Ukraine     | 7 |
| Jia Chen             | Jiangsu Cancer Hospital                                                                                     | China       | 6 |
| Xian Wang            | Sir Run Run Shaw Hospital, Zhejiang University, School of Medicine                                          | China       | 6 |
| Zhou Zhu             | Liuzhou General Hospital                                                                                    | China       | 6 |
| Jianyun Nie          | Yunnan Cancer Hospital                                                                                      | China       | 6 |
| Ying Zhang           | Affiliated Hospital of Guangdong Medical University                                                         | China       | 6 |
| Min Yan              | Henan Cancer Hospital                                                                                       | China       | 6 |
| Iryna Sokur          | CI of Kherson Reg Council Kherson Regional Oncologic Dispensary                                             | Ukraine     | 6 |
| Hryhoriy Bardakov    | Community Treatment-Prevention Institution Chernihiv Regional Oncological Dispensary, Policlinic Department | Ukraine     | 6 |
| Zhendong Zheng       | General Hospital of Shenyang Military Region                                                                | China       | 5 |
| Bangwei Cao          | Beijing Friendship Hospital, Capital Medical University                                                     | China       | 5 |
| Ivan Sinielnikov     | Treatment-Prevention Institution Volyn Regional Oncological Dispensary                                      | Ukraine     | 5 |
| Yevhen Hotko         | CCCH City Oncological Center SHEI Uzhgorod NU                                                               | Ukraine     | 5 |
| Baochun Zhang        | Nantong Tumor Hospital                                                                                      | China       | 4 |
| Peng Shen            | The First Affiliated Hospital, Zhejiang University                                                          | China       | 4 |
| Anwen Liu            | The Second Affiliated Hospital of Nanchang University                                                       | China       | 4 |
| Hongsheng Li         | Cancer Center of Guangzhou Medical University                                                               | China       | 4 |
| Andriy Rusyn         | Transcarpathian Regional Clinical Oncological Dispensary                                                    | Ukraine     | 4 |
| Maria Luisa Tiambeng | Cardinal Santos Medical Center                                                                              | Philippines | 4 |
| Dongyan Cai          | Wuxi 4th People's Hospital                                                                                  | China       | 3 |
| Chunsen Xu           | Fujian Medical University Union Hospital                                                                    | China       | 3 |
| Jinghua Gao          | Hebei Cangzhou Central Hospital                                                                             | China       | 3 |
| Wenjing Hu           | The Affiliated Drum Tower Hospital of Nanjing University                                                    | China       | 3 |
| Yang Zhang           | The Second Hospital of Dalian Medical University                                                            | China       | 3 |
| Igor Drobner         | Khmelnyskyi Regional Oncological Dispensary                                                                 | Ukraine     | 3 |
| Oleksandr Berzoy     | Community Institution Odesa Regional Clinical Hospital                                                      | Ukraine     | 3 |
| Anatolii Chornobai   | Poltava Reg CI Onc Dispensary of PRC Chemotherapy Dept HSEI of Ukr UMMSA                                    | Ukraine     | 3 |
| Liubov Syvak         | National Institute of Cancer                                                                                | Ukraine     | 3 |
| Ma. Noemi Uy         | Cebu Doctors University Hospital                                                                            | Philippines | 3 |
| Peiguo Cao           | The Third Xiangya Hospital of Central South University                                                      | China       | 2 |
| Yuan Chen            | Tongji Hospital, Tongji Medical College, Huazhong University of Science & Technology                        | China       | 2 |

|                               |                                                                            |             |   |
|-------------------------------|----------------------------------------------------------------------------|-------------|---|
| Shukui Qin                    | Nanjing Bayi Hospital                                                      | China       | 2 |
| Aimin Zang                    | Affiliated Hospital of Hebei University                                    | China       | 2 |
| Volodymyr Shamrai             | Podilskyi Regional Oncological Center                                      | Ukraine     | 2 |
| Vanina Htun-Javier            | Metro Davao Medical and Research Center, Inc.                              | Philippines | 2 |
| Junlan Yang                   | Chinese PLA General Hospital Medical School of Chinese PLA                 | China       | 1 |
| Chunmei Bai                   | Peking Union Medical College Hospital                                      | China       | 1 |
| Yan Tan                       | Jilin Province People's Hospital                                           | China       | 1 |
| Xin Hu                        | Nanchong Central Hospital                                                  | China       | 1 |
| Guoping Sun                   | The First Affiliated Hospital of Anhui Medical University                  | China       | 1 |
| Grygorii Ursol                | Treatment-Diagnostic Center of Private Enterprise of PPC Atsynus           | Ukraine     | 1 |
| Nataliya Banakhevych          | Kyiv City Clinical Oncological Center                                      | Ukraine     | 1 |
| Fernando Gracieux             | Manila Doctors Hospital                                                    | Ukraine     | 1 |
| Fatima Fuerte                 | The Medical City                                                           | Philippines | 1 |
| Qi Luo                        | The First Affiliated Hospital of Xiamen University                         | China       | 0 |
| Oleksii Kolesnik              | CI Zaporizhzhia Regional Clinical Oncological Dispensary of ZRC            | Ukraine     | 0 |
| Anna Kryzhanivska             | CI Transcarpathian CI Onc Center Dep of Surgery#1 SHEI Ivano-Frankivsk NMU | Ukraine     | 0 |
| Ying Cheng                    | Jilin Cancer Hospital                                                      | China       | 0 |
| Guia Elena Imelda Ladrera     | Lung Centre of the Philippines                                             | Philippines | 0 |
| Tai-Chung Lam                 | The University of Hong Kong-Shenzhen Hospital                              | China       | 0 |
| Jian Liu                      | Fujian Cancer Hospital                                                     | China       | 0 |
| Rosalinda Pulido              | St. Frances Cabrini Medical Centre                                         | Philippines | 0 |
| Malgorzata Suszko-Kazarnowicz | Olsztyński Ośrodek Onkologiczny Kopernik Sp.z o.o.                         | Poland      | 0 |
| Malgorzata Ulanska            | Centrum Terapii Współczesnej J.M. Jasnorzewska Spółka Komandytowo-Akcyjna  | Poland      | 0 |
| Minghui Zhang                 | Chifeng Municipal Hospital                                                 | China       | 0 |

**Supplementary table 2: Full inclusion and exclusion criteria**

---

**Inclusion criteria:**

---

1. Voluntarily agreed to participate and given written informed consent
2. Male or female  $\geq 18$  years of age on day of signing the informed consent form (ICF)
3. Histologically or cytologically confirmed adenocarcinoma of the breast
4. Recurrent disease not amenable to curative surgery or radiation therapy, or metastatic disease with an indication for a taxane-containing therapy
5. Availability of formalin-fixed paraffin-embedded tissue block from the primary tumor, or a metastatic lesion, to confirm human epidermal growth factor receptor 2-positivity by the central laboratory, based on fluorescence in situ hybridization amplification ratio  $\geq 2$  or immunohistochemistry score 3+, and for hormone status (oestrogen-receptor/progesterone-receptor) determination (local or central laboratory). If not possible, a fresh biopsy was required
6. No prior systemic anticancer agent such as chemotherapy, biological or targeted agent for metastatic disease with the exception of hormonal therapy, which was stopped at least 2 weeks before randomization. Use of herbal remedies or traditional Chinese medicines for anticancer, hematologic or liver function, or anti-infective treatment was stopped at the time of the ICF signature (at least 2 weeks before randomization)
7. For patients with recurrent disease, prior neo-/adjuvant therapy containing trastuzumab and/or lapatinib had been stopped at least 12 months before the diagnosis of recurrent (local or metastatic) disease (i.e., a disease-free interval of  $\geq 12$  months). If trastuzumab/lapatinib was not used, prior neo-/adjuvant therapy with a taxane had been stopped at least 6 months before the diagnosis of recurrent (local or metastatic) disease (i.e., a disease-free interval of  $\geq 6$  months). If only other cytotoxic agents were given, they were stopped at least 4 weeks before randomization. Any hormonal therapy was stopped at the time of the ICF signature (at least 2 weeks before randomization)
8. Measurable disease (at least one measurable target lesion assessed by central imaging review; bone-only or central nervous system [CNS]-only metastases were not allowed)
9. Eastern Cooperative Oncology Group performance status of 0 to 1
10. Left ventricular ejection fraction (LVEF) within institutional range of normal at baseline (within 42 days before randomization) as determined by either echocardiogram (ECHO) or multigated acquisition scan
11. Adequate hematologic, hepatic and renal function as indicated by the following laboratory values:
  - Absolute neutrophil count (ANC)  $\geq 1,500$ /mL without granulocyte-colony stimulating factor (G-CSF) or other medical support
  - Platelets  $\geq 100,000$ /mL
  - Hemoglobin  $\geq 9$  g/dL without transfusion or other medical support within 14 days
  - Serum creatinine  $\leq 1.5 \times$  upper limit of normal (ULN) and creatinine clearance rate  $\geq 50$  mL/min, calculated according to Cockcroft-Gault formula (Note: if the calculated creatinine clearance was  $< 50$  mL/min, a 24-hour creatinine clearance test might have been requested by the Principal Investigator for confirmation. Patients with a 24-hour creatinine clearance  $< 50$  mL/min were excluded)
  - Serum total bilirubin  $\leq 1.5 \times$  ULN (unless the patient had documented Gilbert's syndrome) without any medical support within 14 days
  - Serum aspartate aminotransferase/glutamic-oxaloacetic transaminase (AST/SGOT) or serum alanine aminotransferase/glutamate-pyruvate transaminase (ALT/SGPT)  $\leq 2.5 \times$  ULN ( $\leq 5 \times$  ULN in the case of liver metastases) provided alkaline phosphatase (ALK) was  $\leq 2.5 \times$  ULN. In the case of bone metastasis, serum ALK was  $> 2.5 \times$  ULN if AST and ALT were  $\leq 1.5 \times$  ULN without any medical support within 14 days
  - International normalized ratio (INR), and activated partial prothrombin time (aPTT) or partial prothrombin time (PTT)  $\leq 1.5 \times$  ULN
12. Estimated life expectancy  $\geq 3$  months
13. Female patients were eligible to enter and participate in the study if they were of:-Non-childbearing potential-Childbearing potential, had a negative serum pregnancy test at Screening (within 7 days of the first investigational/comparator product administration), were not breast feeding, and used highly effective or acceptable contraceptive measures before study entry and throughout the study until 7 months after the last investigational/comparator product administration



14. Male patients with partners of childbearing potential were eligible to enter and participate in the study if they were willing to use highly effective or acceptable contraceptive measures before study entry and throughout the study until 7 months after the last investigational/comparator product administration.

**Exclusion criteria:**

---

1. Previously- or on-treated (systemic chemotherapy, biological, or targeted agent, or any other anticancer agent) metastatic breast cancer with the exception of hormonal therapy
  2. Known brain metastasis or any other CNS metastasis that was either symptomatic or untreated. Central nervous system metastases that had been treated by complete resection and/or radiotherapy demonstrating stability or improvement were not an exclusion criterion provided they were stable as shown by computed tomography scan for at least 4 weeks before Screening without evidence of cerebral edema and no requirements for corticosteroids or anticonvulsants
  3. Underlying medical conditions or current severe, uncontrolled systemic disease that, in the Investigator's opinion, made the administration of study drug hazardous. A major surgical procedure (defined as a procedure that required more than 3 weeks without study treatment) within 4 weeks prior to enrolment or anticipation of the need for major surgery during the course of study
  4. Current uncontrolled hypertension (systolic >150 mmHg and/or diastolic >100 mmHg) or unstable angina
  5. History of chronic heart failure based on any New York Heart Association criteria or left ventricular hypertrophy. Current serious cardiac arrhythmia requiring treatment (except atrial fibrillation, paroxysmal supraventricular tachycardia) or clinically significant conduction defects as seen on electrocardiogram. History of myocardial infarction within 6 months of randomization. History of LVEF declined to below 50% during or after prior trastuzumab neo-adjuvant or adjuvant therapy. Significant cardiac murmurs either on examination or ECHO
  6. History of prior exposure to doxorubicin >360 mg/m<sup>2</sup> (or equivalent)
  7. Use of oral, injected or implanted hormonal methods of contraception
  8. Known hypersensitivity to any of the study drugs
  9. Residual non-hematologic toxicity ≥ Grade 2 from prior therapy.
-

**Supplementary table 3:** Summary of major protocol deviations that excluded patients from per-protocol set by treatment group—ITT set

|                                            | <b>HLX02<br/>n = 324</b> | <b>EU-trastuzumab<br/>n = 325</b> |
|--------------------------------------------|--------------------------|-----------------------------------|
| With at least one major protocol deviation | 4 (1.2)                  | 8 (2.5)                           |
| Eligibility and Entry Criteria             | 4 (1.2)                  | 6 (1.8)                           |
| Serious Adverse Event Criteria             | 0                        | 2 (0.6)                           |
| Study Procedures Criteria                  | 0                        | 2 (0.6)                           |
| Efficacy Criteria                          | 0                        | 1 (0.3)                           |
| Informed Consent                           | 0                        | 1 (0.3)                           |
| Other Criteria                             | 0                        | 1 (0.3)                           |

EU-trastuzumab, European Union-sourced trastuzumab; ITT, intention-to-treat.

**Supplementary table 4:** Exposure to study treatment (HLX02/EU-trastuzumab)—safety set

| <b>Characteristic</b>                  | <b>HLX02<br/>n = 324</b> | <b>EU-trastuzumab<br/>n = 325</b> |
|----------------------------------------|--------------------------|-----------------------------------|
| Number of cycle completed              |                          |                                   |
| Mean (SD)                              | 12.4 (5.4)               | 11.8 (5.4)                        |
| Median (range)                         | 15 (1–17)                | 14 (1–17)                         |
| Number of cycle has completed N, n (%) |                          |                                   |
| Cycle 1                                | 9 (2.8)                  | 3 (0.9)                           |
| Cycle 2                                | 20 (6.2)                 | 21 (6.5)                          |
| Cycle 3                                | 3 (0.9)                  | 4 (1.2)                           |
| Cycle 4                                | 13 (4)                   | 20 (6.2)                          |
| Cycle 5                                | 5 (1.5)                  | 5 (1.5)                           |
| Cycle 6                                | 17 (5.2)                 | 24 (7.4)                          |
| Cycle 7                                | 3 (0.9)                  | 6 (1.8)                           |
| Cycle 8                                | 19 (5.9)                 | 21 (6.5)                          |
| Cycle 9                                | 8 (2.5)                  | 7 (2.2)                           |
| Cycle 10                               | 8 (2.5)                  | 8 (2.5)                           |
| Cycle 11                               | 23 (7.1)                 | 33 (10.2)                         |
| Cycle 12                               | 5 (1.5)                  | 7 (2.2)                           |
| Cycle 13                               | 9 (2.8)                  | 3 (0.9)                           |
| Cycle 14                               | 18 (5.6)                 | 18 (5.5)                          |
| Cycle 15                               | 5 (1.5)                  | 5 (1.5)                           |
| Cycle 16                               | 4 (1.2)                  | 2 (0.6)                           |
| Cycle 17                               | 155 (47.8)               | 138 (42.5)                        |
| Total exposure duration (days)         |                          |                                   |
| Mean (SD)                              | 264.6 (114.8)            | 253.4 (114.3)                     |
| Median (range)                         | 312 (21–408)             | 292 (21–417)                      |
| Injection times                        |                          |                                   |
| Mean (SD)                              | 12.4 (5.4)               | 11.8 (5.4)                        |
| Median (range)                         | 15 (1–17)                | 14 (1–17)                         |
| Total exposure intensity (mg/day)      |                          |                                   |
| Mean (SD)                              | 19.1 (3.8)               | 18.8 (3.8)                        |
| Median (range)                         | 18.4 (12.2–33.9)         | 18.1 (11.1–37.1)                  |
| Relative dose intensity                |                          |                                   |
| Mean (SD)                              | 100 (0.7)                | 100 (1.1)                         |
| Median (range)                         | 100 (93.3–103)           | 100 (88.9–110.8)                  |
| Dose reduced of IP, n (%)              | 0                        | 1 (0.3)                           |
| Dose delayed of IP, n (%)              | 55 (17)                  | 46 (14.2)                         |
| Dose interrupted of IP, n (%)          | 21 (6.5)                 | 16 (4.9)                          |

EU-trastuzumab, European Union-sourced trastuzumab; IP, investigational product (HLX02 or EU-trastuzumab); SD, standard deviation.

**Supplementary table 5:** Exposure to docetaxel—safety set

| <b>Characteristic</b>                  | <b>HLX02<br/>n = 324</b> | <b>EU-trastuzumab<br/>n = 325</b> |
|----------------------------------------|--------------------------|-----------------------------------|
| Number of cycle completed              |                          |                                   |
| n (missing)                            | 321 (3)                  | 324 (1)                           |
| Mean (SD)                              | 8.2 (3.5)                | 8.1 (3.5)                         |
| Median (range)                         | 8 (1–17)                 | 8 (1–17)                          |
| Number of cycle has completed N, n (%) |                          |                                   |
| Cycle 1                                | 6 (1.9)                  | 4 (1.2)                           |
| Cycle 2                                | 20 (6.2)                 | 21 (6.5)                          |
| Cycle 3                                | 4 (1.2)                  | 5 (1.5)                           |
| Cycle 4                                | 14 (4.3)                 | 21 (6.5)                          |
| Cycle 5                                | 6 (1.9)                  | 6 (1.8)                           |
| Cycle 6                                | 25 (7.7)                 | 28 (8.6)                          |
| Cycle 7                                | 12 (3.7)                 | 15 (4.6)                          |
| Cycle 8                                | 154 (47.5)               | 141 (43.4)                        |
| Cycle 9                                | 9 (2.8)                  | 7 (2.2)                           |
| Cycle 10                               | 17 (5.2)                 | 14 (4.3)                          |
| Cycle 11                               | 13 (4)                   | 23 (7.1)                          |
| Cycle 12                               | 6 (1.9)                  | 6 (1.8)                           |
| Cycle 13                               | 5 (1.5)                  | 3 (0.9)                           |
| Cycle 14                               | 6 (1.9)                  | 8 (2.5)                           |
| Cycle 15                               | 2 (0.6)                  | 2 (0.6)                           |
| Cycle 16                               | 1 (0.3)                  | 2 (0.6)                           |
| Cycle 17                               | 21 (6.5)                 | 18 (5.5)                          |
| Total exposure duration (days)         |                          |                                   |
| Mean (SD)                              | 173.9 (74.9)             | 172.5 (75)                        |
| Median (range)                         | 168 (21–407)             | 168 (21–380)                      |
| Injection times                        |                          |                                   |
| Mean (SD)                              | 8.2 (3.5)                | 8.1 (3.5)                         |
| Median (range)                         | 8 (1–17)                 | 8 (1–17)                          |

EU-trastuzumab, European Union-sourced trastuzumab; SD, standard deviation.

**Supplementary table 6:** Cardiac disorders of special interest by system organ class and preferred term—safety set

| <b>System organ class</b>                   | <b>HLX02</b>   | <b>EU-trastuzumab</b> |
|---------------------------------------------|----------------|-----------------------|
| <b>Preferred term</b>                       | <b>n = 324</b> | <b>n = 325</b>        |
|                                             | <b>n (%)</b>   | <b>n (%)</b>          |
| Total Cardiac disorders of special interest | 19             | 26                    |
| Cardiac disorders, n (%)                    | 16 (4.9)       | 17 (5.2)              |
| Sinus tachycardia                           | 2 (0.6)        | 3 (0.9)               |
| Left ventricular dysfunction                | 3 (0.9)        | 0 (0)                 |
| Myocardial ischaemia                        | 2 (0.6)        | 1 (0.3)               |
| Cardiac failure chronic                     | 0 (0)          | 2 (0.6)               |
| Cardiac failure congestive                  | 0 (0)          | 2 (0.6)               |
| Cardiotoxicity                              | 1 (0.3)        | 1 (0.3)               |
| Sinus arrhythmia                            | 1 (0.3)        | 1 (0.3)               |
| Systolic dysfunction                        | 1 (0.3)        | 1 (0.3)               |
| Tricuspid valve incompetence                | 0 (0)          | 2 (0.6)               |
| Ventricular arrhythmia                      | 1 (0.3)        | 1 (0.3)               |
| Arrhythmia                                  | 0 (0)          | 1 (0.3)               |
| Atrial fibrillation                         | 1 (0.3)        | 0 (0)                 |
| Atrioventricular block                      | 0 (0)          | 1 (0.3)               |
| Bradycardia                                 | 0 (0)          | 1 (0.3)               |
| Cardiac failure                             | 1 (0.3)        | 0 (0)                 |
| Left atrial enlargement                     | 0 (0)          | 1 (0.3)               |
| Mitral valve incompetence                   | 0 (0)          | 1 (0.3)               |
| Nodal arrhythmia                            | 1 (0.3)        | 0 (0)                 |
| Palpitations                                | 0 (0)          | 1 (0.3)               |
| Pericardial effusion                        | 1 (0.3)        | 0 (0)                 |
| Right ventricular failure                   | 1 (0.3)        | 0 (0)                 |
| Sinus bradycardia                           | 1 (0.3)        | 0 (0)                 |
| Supraventricular extrasystoles              | 0 (0)          | 1 (0.3)               |
| Tricuspid valve disease                     | 0 (0)          | 1 (0.3)               |
| Ventricular extrasystoles                   | 0 (0)          | 1 (0.3)               |
| Ventricular hypokinesia                     | 1 (0.3)        | 0 (0)                 |

EU-trastuzumab, European Union-sourced trastuzumab.

**Supplementary table 7:** Summary of the incidence of ADA—safety set

| <b>Visit</b>         | <b>Parameter</b> | <b>HLX02<br/>n = 324</b> | <b>EU-trastuzumab<br/>n = 325</b> |
|----------------------|------------------|--------------------------|-----------------------------------|
| Screening            | Positive         | 6                        | 17                                |
|                      | Negative         | 315                      | 307                               |
|                      | NA               | 3                        | 1                                 |
| C3D1                 | Positive         | 1                        | 1                                 |
|                      | Negative         | 283                      | 294                               |
|                      | NA               | 40                       | 30                                |
| C6D1                 | Positive         | 0                        | 0                                 |
|                      | Negative         | 266                      | 262                               |
|                      | NA               | 58                       | 63                                |
| C9D1                 | Positive         | 0                        | 0                                 |
|                      | Negative         | 234                      | 221                               |
|                      | NA               | 90                       | 104                               |
| C12D1                | Positive         | 0                        | 0                                 |
|                      | Negative         | 197                      | 183                               |
|                      | NA               | 127                      | 142                               |
| C15D1                | Positive         | 0                        | 0                                 |
|                      | Negative         | 169                      | 145                               |
|                      | NA               | 155                      | 180                               |
| Follow-up            | Positive         | 1                        | 2                                 |
|                      | Negative         | 269                      | 263                               |
|                      | NA               | 54                       | 60                                |
| Overall <sup>a</sup> | Positive         | 2                        | 2                                 |
|                      | Other            | 322                      | 323                               |

<sup>a</sup>A patient is considered positive if ADA positive result is observed at any visit over the course of treatment until 30 days post-last treatment.

ADA, anti-drug antibody; C, Cycle; D, day; EU-trastuzumab, European Union-sourced trastuzumab.

**Supplementary table 8:** Summary of the incidences of NADA in ADA positive patients at each time point—safety set

| <b>Visit</b>         | <b>Parameter</b> | <b>HLX02<br/>n = 8</b> | <b>EU-trastuzumab<br/>n = 18</b> |
|----------------------|------------------|------------------------|----------------------------------|
| Screening            | Positive         | 4                      | 6                                |
|                      | Negative         | 2                      | 11                               |
|                      | Total            | 6                      | 17                               |
| C3D1                 | Positive         | 1                      | 1                                |
|                      | Negative         | 0                      | 0                                |
|                      | Total            | 1                      | 1                                |
| C6D1                 | Positive         | 0                      | 0                                |
|                      | Negative         | 0                      | 0                                |
|                      | Total            | 0                      | 0                                |
| C9D1                 | Positive         | 0                      | 0                                |
|                      | Negative         | 0                      | 0                                |
|                      | Total            | 0                      | 0                                |
| C12D1                | Positive         | 0                      | 0                                |
|                      | Negative         | 0                      | 0                                |
|                      | Total            | 0                      | 0                                |
| C15D1                | Positive         | 0                      | 0                                |
|                      | Negative         | 0                      | 0                                |
|                      | Total            | 0                      | 0                                |
| Follow-up            | Positive         | 1                      | 2                                |
|                      | Negative         | 0                      | 0                                |
|                      | Total            | 1                      | 2                                |
| Overall <sup>a</sup> | Positive         | 2                      | 2                                |
|                      | Negative         | 6                      | 16                               |
|                      | Total            | 8                      | 18                               |

<sup>a</sup>A patient is considered positive if NADA positive result is observed at any visit over the course of treatment until 30 days post-last treatment.

ADA, anti-drug antibody; C, cycle; D, day; EU-trastuzumab, European Union-sourced trastuzumab; NADA, neutralizing anti-drug antibody.
